# Supplementary material for: Ti2CO2MXene: a highly active and selective photocatalyst for CO2reduction
Source: Royal Society of Chemistry journal article supplement (doi:10.1039/c7ta03557h), 2017-01-01
Supplement: c7ta03557h1.pdf [file c7ta03557h1.pdf]

Electronic Supplementary Information (ESI)

## **Ti<sub>2</sub>CO<sub>2</sub> MXene: A Highly Active and Selective Photocatalyst for CO<sub>2</sub> Reduction**

Xu Zhang, Zihe Zhang, Jielan Li, Xudong Zhao, Dihua Wu and Zhen Zhou\*

School of Materials Science and Engineering, National Institute for Advanced Materials, Computational Centre for Molecular Science, Institute of New Energy Material Chemistry, Collaborative Innovation Centre of Chemical Science and Engineering (Tianjin), Nankai University, Tianjin 300350, P. R. China

\*Corresponding Authors. Email: [zhouzhen@nankai.edu.cn](mailto:zhouzhen@nankai.edu.cn) (Z.Z.)

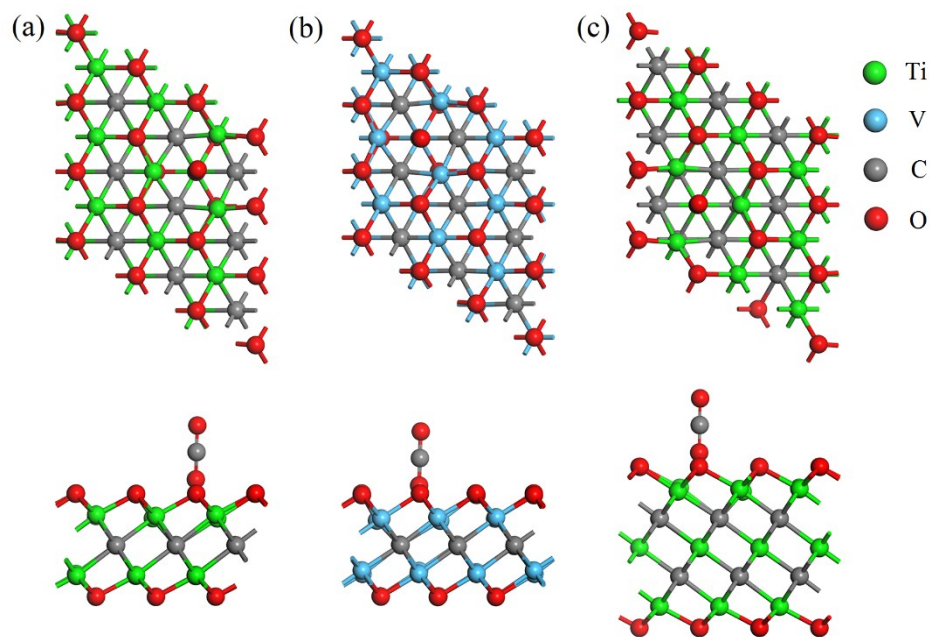

Fig. S1. Top (up) and side (down) view of the optimized energetically most favorable structures of CO<sub>2</sub> adsorbed at the O<sub>v</sub> in (a) Ti<sub>2</sub>CO<sub>2</sub>, (b) V<sub>2</sub>CO<sub>2</sub> and (c) Ti<sub>3</sub>C<sub>2</sub>O<sub>2</sub> monolayers.

Table S1. The adsorption energies  $E_{\text{ads}}$  (eV) of CO<sub>2</sub> at O<sub>v</sub> on Ti<sub>2</sub>CO<sub>2</sub>, V<sub>2</sub>CO<sub>2</sub> and Ti<sub>3</sub>C<sub>2</sub>O<sub>2</sub> monolayer and the average atomic charge a.c. ( $|e|$ ) of the oxygen atoms adsorbed in O<sub>v</sub> and the metal atoms around O<sub>v</sub>.

|                                               | $E_{\text{ads}}$ | a.c. (O) | a.c. (M) |
|-----------------------------------------------|------------------|----------|----------|
| Ti <sub>2</sub> CO <sub>2</sub>               | -0.67            | -1.15    | 1.76     |
| V <sub>2</sub> CO <sub>2</sub>                | -0.35            | -1.14    | 1.60     |
| Ti <sub>3</sub> C <sub>2</sub> O <sub>2</sub> | -0.73            | -1.14    | 1.78     |

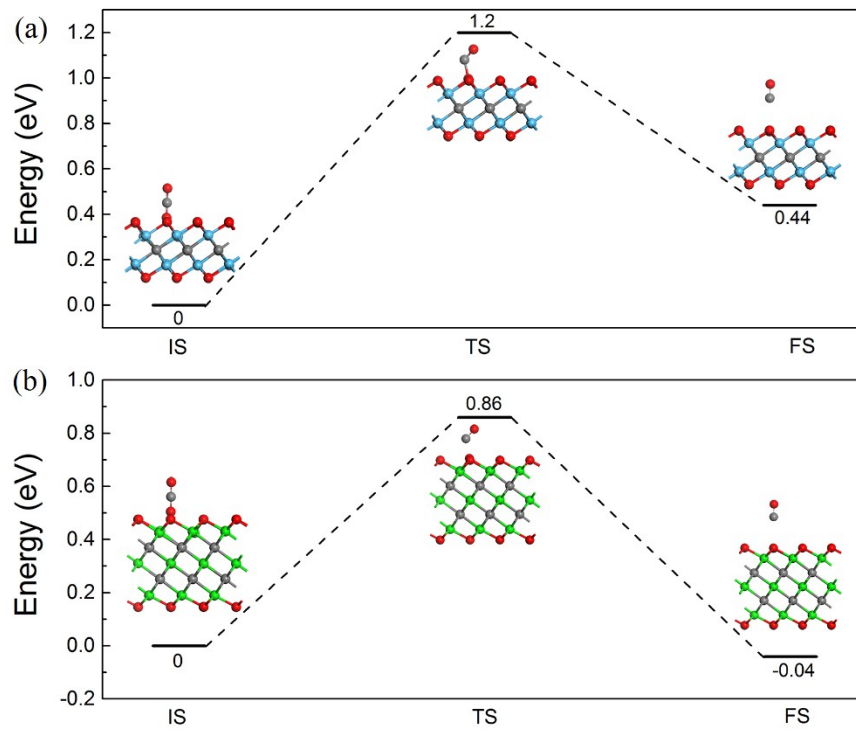

Fig. S2. Reaction pathway (i) at O<sub>v</sub> in (a) V<sub>2</sub>CO<sub>2</sub> and (b) Ti<sub>3</sub>C<sub>2</sub>O<sub>2</sub> monolayer.

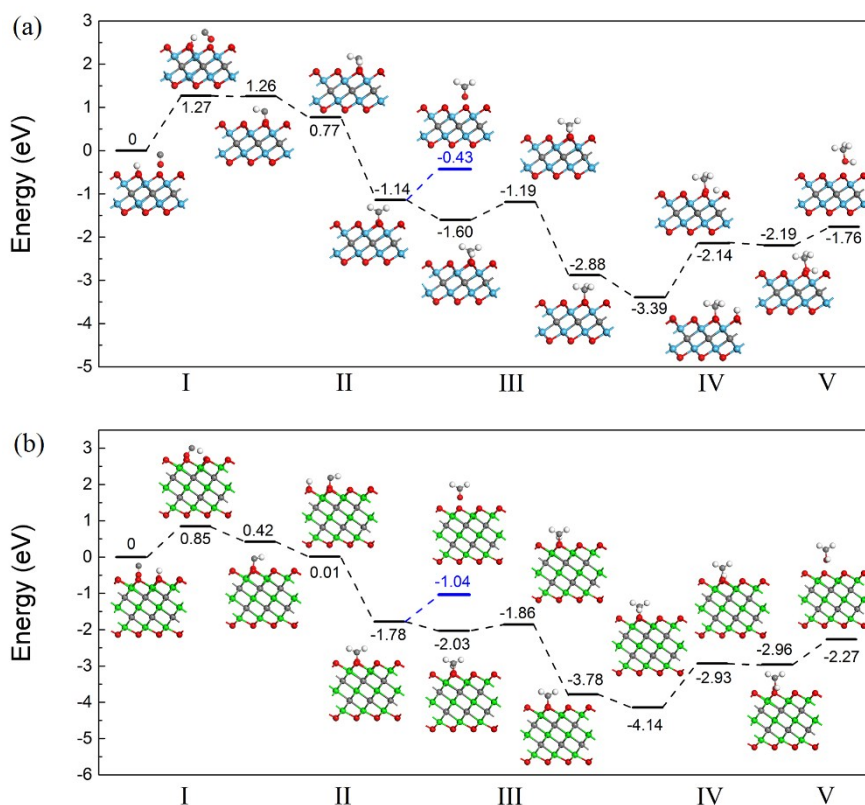

Fig. S3. Reaction pathway of hydrogenation of CO at  $O_v$  in (a)  $V_2CO_2$  and (b)  $Ti_3C_2O_2$  monolayers.

I:  $CO \rightarrow HCO$ ; II:  $HCO \rightarrow HCHO$ , the blue lines represent the desorption of formaldehyde; III:  $HCHO \rightarrow CH_3O$ ; IV:  $CH_3O \rightarrow CH_3OH$ ; V: the desorption of methanol.

For  $V_2CO_2$ , in the first step, the CO molecule is also adsorbed at  $O_v$  vertically and then the adsorbed proton approaches the C atom to form HCO by overcoming an energy barrier of 1.27 eV. Then, the HCO is further hydrogenated to HCHO without any energy barrier. The process of the desorption of formaldehyde is exothermic by 0.71 eV. In process III, the third proton approaches the C atom by overcoming an energy barrier of 0.17 eV with an exothermic process. In process IV, an energy barrier of 1.25 eV should be overcome. At the final step, the methanol is released with a barrier of 0.43 eV.

For  $Ti_3C_2O_2$ , the overall energy barrier of the reduction of  $CO_2$  to formaldehyde is 0.85 eV, while to catalyze the further reduction to  $CH_3OH$ , an energy barrier of 1.21 eV should be overcome.

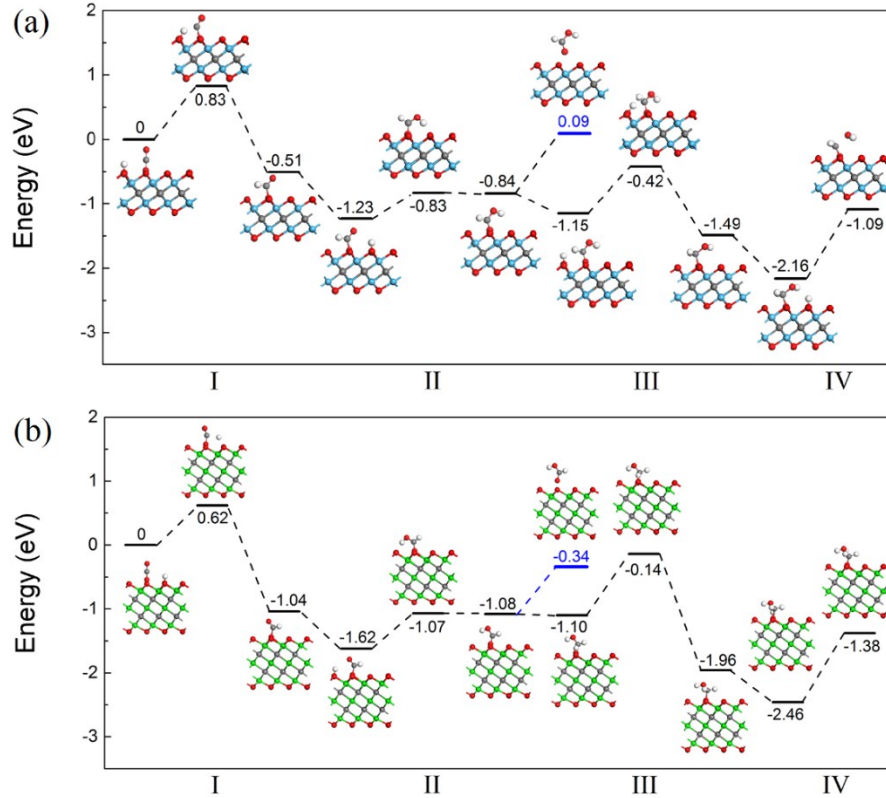

Fig. S4. Reaction pathway of hydrogenation of  $\text{CO}_2$  at  $\text{O}_v$  in (a)  $\text{V}_2\text{CO}_2$  and (b)  $\text{Ti}_3\text{C}_2\text{O}_2$  monolayer.

I:  $\text{CO}_2 \rightarrow \text{HCOO}$ ; II:  $\text{HCOO} \rightarrow \text{HCOOH}$ ; the blue lines represent the desorption of formic acid; III:  $\text{HCOOH} \rightarrow \text{H}_2\text{COOH}$ ; IV:  $\text{H}_2\text{COOH} \rightarrow \text{HCHO} + \text{H}_2\text{O}$ .

For  $\text{V}_2\text{CO}_2$ , the energy barrier to form  $\text{HCOO}$  is higher than that on  $\text{Ti}_2\text{CO}_2$  (0.83 eV) in process I. In the next process, the second proton approaches the C atom by overcoming an energy barrier of 0.4 eV. Then the desorption of the  $\text{HCOOH}$  needs a high energy value of 0.93 eV. In process III, an energy barrier of 0.73 eV should be overcome for the further hydrogenation of  $\text{HCOOH}$ . At the final process, a very high energy barrier of 1.07 eV should be overcome, indicating that it is extremely difficult to realize in experiments.

For  $\text{Ti}_3\text{C}_2\text{O}_2$ , an overall barrier of 0.62 eV should be overcome to form  $\text{HCOOH}$ . The desorption process of the  $\text{HCOOH}$  is exothermic by 0.74 eV. However, the further hydrogenation of  $\text{HCOOH}$  is extremely difficult due to a high energy barrier of  $\sim 1$  eV.
